# Supplementary material
Source: publisher figshare collection journal article supplement (https://sage.figshare.com/ndownloader/files/15964532)
Supplement: Supplementary file 1 [file 15964532]

# Supplemental Material

Table S1. Simple and multiple regression analyses in Study 1

| Dependent Variables | Independent Variables         | Simple Regression |         | Multiple Regression |         |
|---------------------|-------------------------------|-------------------|---------|---------------------|---------|
|                     |                               | B                 | P       | B                   | P       |
| RSES                | SUS                           | 0.60*             | < 0.001 | 0.55*               | < 0.001 |
|                     | Sex                           | -0.27*            | 0.04    | -                   | -       |
|                     | Age                           | 0.40*             | < 0.001 | 0.18                | 0.11    |
|                     | BCVA                          | 0.14              | 0.30    | -                   | -       |
|                     | WCVA                          | 0.04              | 0.78    | -                   | -       |
|                     | History of VI                 | 0.03              | 0.82    | -                   | -       |
|                     | Disability grades             | -0.09             | 0.50    | -                   | -       |
|                     | Years of living with VI       | 0.35*             | 0.01    | 0.15                | 0.20    |
|                     | Education                     | 0.14              | 0.30    | -                   | -       |
|                     | Employment status             | -0.32*            | 0.01    | -0.04               | 0.75    |
|                     | Systemic diseases             | 0.10              | 0.44    | -                   | -       |
|                     | Annual incomes                | 0.25*             | 0.05    | 0.09                | 0.44    |
|                     | Live independently            | 0.09              | 0.49    | -                   | -       |
|                     | Supports for daily activities | -0.22             | 0.09    | -                   | -       |
|                     | Social support                | -0.15             | 0.25    | -                   | -       |
| SWLS                | SUS                           | 0.56*             | < 0.001 | 0.48*               | < 0.001 |
|                     | Sex                           | -0.02             | 0.86    | -                   | -       |
|                     | Age                           | 0.41*             | < 0.001 | 0.18                | 0.12    |
|                     | BCVA                          | -0.00             | 0.98    | -                   | -       |
|                     | WCVA                          | -0.14             | 0.28    | -                   | -       |
|                     | History of VI                 | 0.01              | 0.95    | -                   | -       |
|                     | Disability grades             | -0.03             | 0.83    | -                   | -       |
|                     | Years of living with VI       | 0.37*             | < 0.001 | 0.18                | 0.14    |
|                     | Education                     | 0.25*             | 0.05    | 0.15                | 0.18    |
|                     | Employment status             | -0.27*            | 0.04    | 0.03                | 0.82    |
|                     | Systemic diseases             | 0.00              | 0.99    | -                   | -       |
|                     | Annual incomes                | 0.13              | 0.33    | -                   | -       |
|                     | Live independently            | 0.05              | 0.71    | -                   | -       |
|                     | Supports for daily activities | -0.14             | 0.31    | -                   | -       |
|                     | Social support                | 0.06              | 0.65    | -                   | -       |
| SHS                 | SUS                           | 0.62*             | < 0.001 | 0.56*               | < 0.001 |
|                     | Sex                           | -0.06             | 0.67    | -                   | -       |
|                     | Age                           | 0.30*             | 0.02    | 0.04                | 0.72    |
|                     | BCVA                          | 0.02              | 0.90    | -                   | -       |
|                     | WCVA                          | -0.08             | 0.54    | -                   | -       |

|                               |        |      |       |      |
|-------------------------------|--------|------|-------|------|
| History of VI                 | -0.00  | 0.99 | -     | -    |
| Disability grades             | 0.01   | 0.94 | -     | -    |
| Years of living with VI       | 0.34*  | 0.01 | 0.16  | 0.16 |
| Education                     | 0.22   | 0.09 | -     | -    |
| Employment status             | -0.32* | 0.01 | -0.01 | 0.97 |
| Systemic diseases             | 0.06   | 0.65 | -     | -    |
| Annual incomes                | 0.28*  | 0.03 | 0.15  | 0.20 |
| Live independently            | 0.12   | 0.35 | -     | -    |
| Supports for daily activities | -0.19  | 0.15 | -     | -    |
| Social support                | -0.10  | 0.46 | -     | -    |

RSES: Rosenberg Self-Esteem Scale; SUS: Strength Use Scale; SWLS: Satisfaction with Life Scale; SHS: Subjective Happiness Scale; BCVA: better-eye corrected visual acuity; WCVA: worse-eye corrected visual acuity; VI: visual impairments; History of VI: congenital/acquired. Disability grades: The legal Japanese visual impairment grades. A lower grade indicates a higher level of visual impairment. Employment status: employed, unemployed, and temporary leave. Systemic diseases: depression (n = 2); chronic pancreatitis (n = 3), diabetes (n = 7), high blood pressure (n = 5), chronic pain (n = 2), orthopedic disease (n = 2), hearing loss (n = 2), and atopic dermatitis (n = 1). SD: standard deviation. P < 0.05

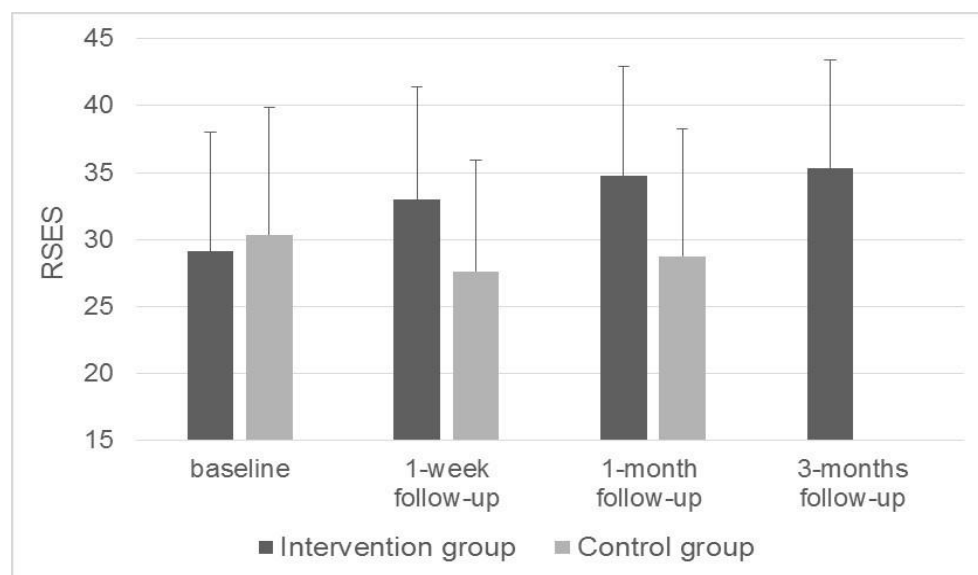

**Figure S1.** The Rosenberg Self-Esteem Scale scores of each time point in both the intervention and control group in Study 2

RSES: Rosenberg Self-Esteem Scale. A one-way ANCOVA indicated that there was a significant difference in the effect of the strengths intervention on the improvement in RSES scores from baseline to 1-month follow-up after controlling for the baseline RSES score [ $F(1, 19) = 18.61$ ,  $P < 0.001$ ].
